# Supplementary material for: Imputation of ancient human genomes
Source: Springer Nature journal article supplement (doi:10.1038/s41467-023-39202-0), 2023-06-20
Supplement: MOESM1 [file 41467_2023_39202_MOESM1_ESM.pdf]

# Supplementary information

Bárbara Sousa da Mota<sup>1,2</sup>, Simone Rubinacci<sup>1,2</sup>, Diana Ivette Cruz Dávalos<sup>1,2</sup>, Carlos Eduardo G. Amorim<sup>3</sup>, Martin Sikora<sup>4</sup>, Niels N. Johannsen<sup>5</sup>, Marzena Szmyt<sup>6</sup>, Piotr Włodarczak<sup>7</sup>, Anita Szczepanek<sup>7,8</sup>, Marcin M. Przybyła<sup>9</sup>, Hannes Schroeder<sup>10</sup>, Morten E. Allentoft<sup>11,4</sup>, Eske Willerslev<sup>4,12,13,14</sup>, Anna-Sapfo Malaspinas<sup>1,2\*</sup>@, Olivier Delaneau<sup>1,2\*</sup>

<sup>1</sup>Department of Computational Biology, University of Lausanne, Switzerland

<sup>2</sup>Swiss Institute of Bioinformatics, University of Lausanne, Switzerland

<sup>3</sup>Department of Biology, California State University, Northridge, California, United States of America

<sup>4</sup>Lundbeck Foundation GeoGenetics Centre, Globe Institute, University of Copenhagen, Copenhagen, Denmark

<sup>5</sup>Department of Archaeology and Heritage Studies, Aarhus University, Denmark

<sup>6</sup>Institute for Eastern Research, Adam Mickiewicz University in Poznań, Poznań, Poland

<sup>7</sup>Institute of Archaeology and Ethnology, Polish Academy of Sciences, Kraków, Poland

<sup>8</sup>Department of Anatomy, Jagiellonian University, Medical College, Kraków, Poland

<sup>9</sup>Institute of Archaeology, Jagiellonian University, Kraków, Poland

<sup>10</sup>The Globe Institute, Faculty of Health and Medical Sciences, University of Copenhagen, Copenhagen, Denmark

<sup>11</sup>Trace and Environmental DNA (TrEnD) Laboratory, School of Molecular and Life Science, Curtin University, Australia

<sup>12</sup>GeoGenetics Group, Department of Zoology, University of Cambridge, Cambridge, UK

<sup>13</sup>Wellcome Sanger Institute, Wellcome Genome Campus, Cambridge, UK

<sup>14</sup>MARUM, University of Bremen, Bremen, Germany

\* These authors jointly supervised this work

## Supplementary Note 1: Effect of using different genotype callers to generate genotype likelihoods, i.e., input for imputation

In order to determine whether the choice of genotype caller to calculate genotype likelihoods prior to imputation influences the quality of the imputed calls, we compared the accuracy of imputation using genotype likelihoods obtained with two different callers i) bcftools<sup>1</sup>, a tool designed to handle modern DNA, and ii) ATLAS<sup>2</sup>, a genotype caller that models and/or estimates deamination patterns and takes these into account when calling genotypes for ancient genomes. In the case of ATLAS, we empirically estimated the damage pattern before proceeding to genotype calling. In addition, to compute the imputation accuracy, we used two different validation sets, where calls were obtained using i) bcftools and ii) ATLAS. Supplementary Fig. 1 shows imputation accuracy obtained with the four previously described configurations for a subset of 16 genomes downsampled to 1.0x prior to imputation. For a few genomes, such as Lovelock2<sup>3</sup> and SIII<sup>4</sup>, there were no noticeable differences between the different configurations. In most cases, the most striking differences were between validation sets, regardless of the genotype likelihoods set used for imputation. Indeed, the accuracy curves tend to cluster by validation rather than genotype likelihood set. However, in the case of Sumidouro5, there is a larger difference between the two different genotype likelihood configurations for the same validation set, particularly at sites with minor allele frequency (MAF) below 5%. For this genome, with 40% frequency of C-to-T substitutions at the reads' ends, the highest accuracy was obtained with both imputation using genotype likelihoods and validation calls obtained with ATLAS. In conclusion, imputation calls were not significantly affected by the choice of tool to call genotype likelihoods for most of the cases here analyzed and, therefore, we chose to calculate genotype likelihoods using bcftools with no further filtering before imputation. However, the two genotype callers used to obtain the validation calls from the high-coverage genomes had clear differences and we further investigated the differences between them in the next section.

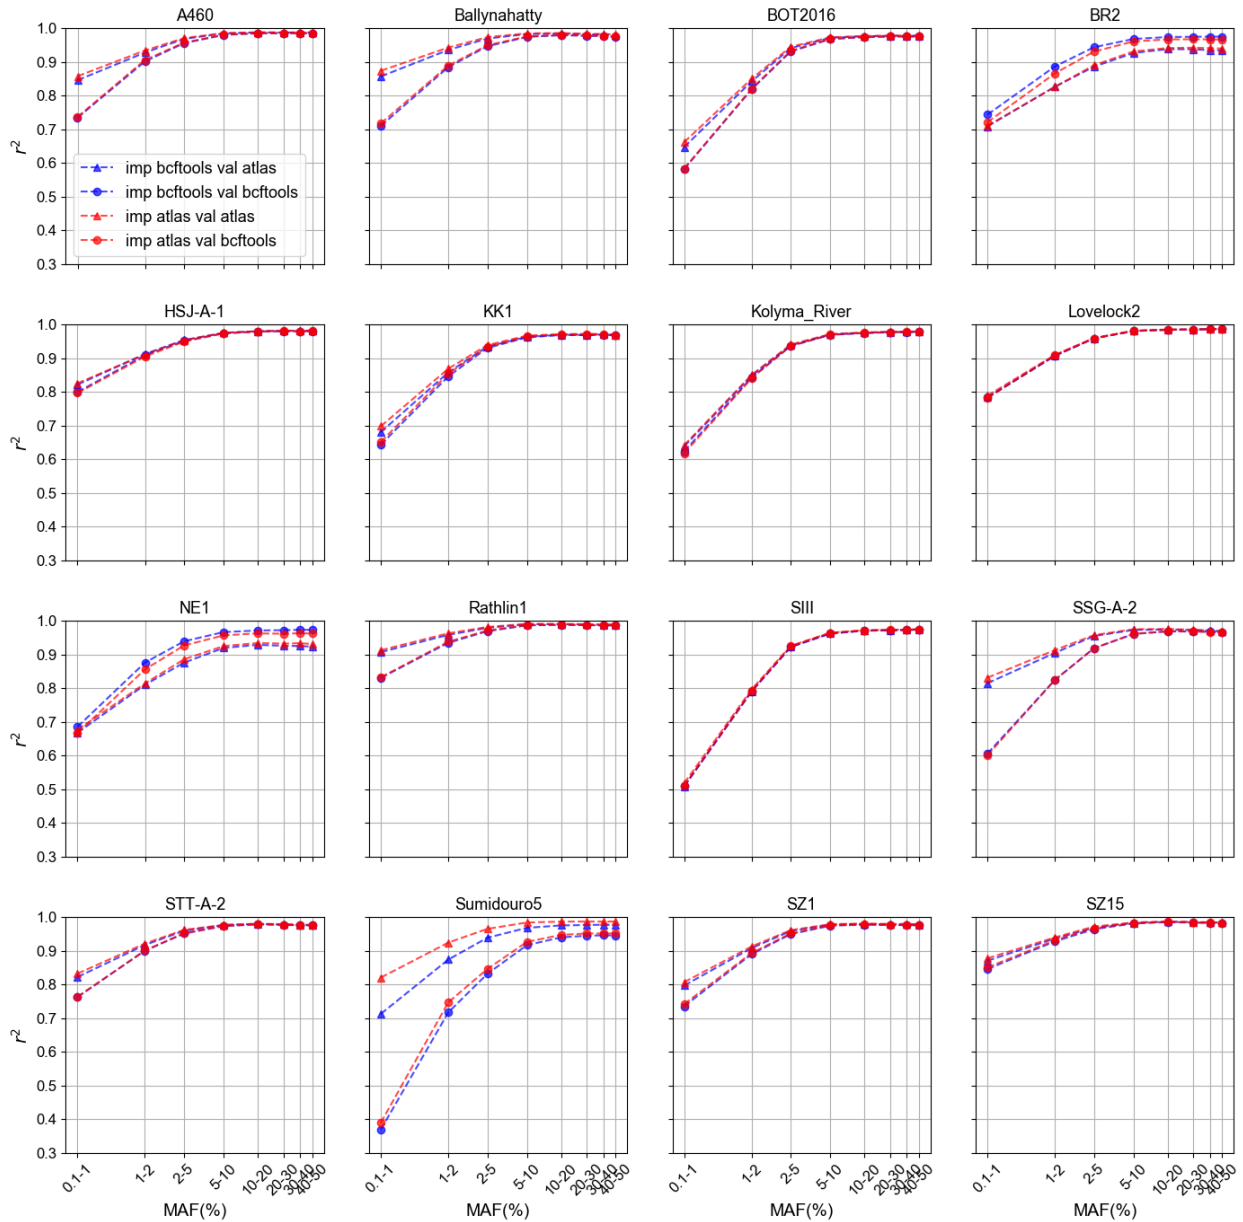

**Supplementary Fig. 1. Effect of genotype caller on imputation accuracy.** Imputation accuracy for a subset of 16 imputed 1.0x genomes, where imputation was performed from genotype likelihoods calculated with i) bcftools (purple) and ii) ATLAS (green). Two different validation sets were used in these analyses that differ in the tool used to call genotypes: i) bcftools (circles) and ii) ATLAS (triangles).

## Supplementary Note 2: Validation dataset

In order to be able to assess imputation accuracy when imputing low-coverage ancient genomes, we resorted to downsampling and imputing ancient genomes with average depth of coverage above 10x, using the high-coverage genomes as ground truth. However, these high-coverage genomes are not free from the inherent ancient DNA challenges, in particular, base deamination. This constitutes a problem in determining what the true genotypes are for a particular genome, thus affecting how well we can validate imputation results in the context of this work. To determine how we can best circumvent this problem, we tried different approaches to generate the validation calls that were expected to decrease the impact of ancient DNA damage on the resulting genotype calls in the case of four 1x ancient genomes, namely, RISE1168<sup>5,6</sup>, SIII<sup>4</sup> (UDG-treated), Sumidouro5<sup>3</sup> (a highly damaged genome) and WC1<sup>7</sup> (with intermediately high damage levels). Firstly, we called genotypes with ATLAS, a genotype caller that models the deamination patterns at the ends of reads, except for RISE1168, that includes paired-end libraries in addition to single-end libraries. Then, prior to genotype calling with bcftools, we trimmed five base pairs from the reads in the bam files using BamUtil<sup>8</sup>. We also followed the filtering approach carried out in previous studies<sup>3</sup>: i) we called genotypes with bcftools using reads with mapping quality of at least 30 and bases with quality 20 (“-q 30 -Q 20”), as well as the recommended option -C 50; ii) we retained only the sites present in the 1000 Genomes accessible genome strict mask; iii) we excluded sites located in regions known to contain repetitions; iv) we removed sites that have depth below the maximum of one third of the mean depth of coverage and eight, as this is typically the minimum depth of coverage for which we can confidently call genotypes, and sites that have depth above twice the mean depth; v) we retained sites for which the field QUAL is equal or greater than 30. Finally, we used these different genotype call sets as validation when evaluating imputation accuracy for the four aforementioned genomes. We learnt that the application of the aforementioned five filters gives a consistently higher agreement between imputation and validation calls, even though it does not yield the highest accuracy for the four genomes (Supplementary Fig. 2). In the case of Sumidouro5, ATLAS outperformed the other approaches, with the five filters approach in second place, but

ATLAS performance was not consistent across samples. The trimming approach yielded intermediate accuracy curves, in general, but, compared to the five-filter option in the case of Sumidouro5, it yielded much lower values at rare variants (MAF<2%). Given these results, we chose to generate the validation calls used in all the analyses in the main paper by applying the five-filter approach. However, we are aware that more accurate calls could be obtained by applying stricter filters for particular genomes that contain more degradation, including Sumidouro5, as was done in Moreno-Mayar et al.<sup>3</sup> We decided, instead, to apply the same approach to all 42 high-coverage genomes to expedite the process and have consistent datasets.

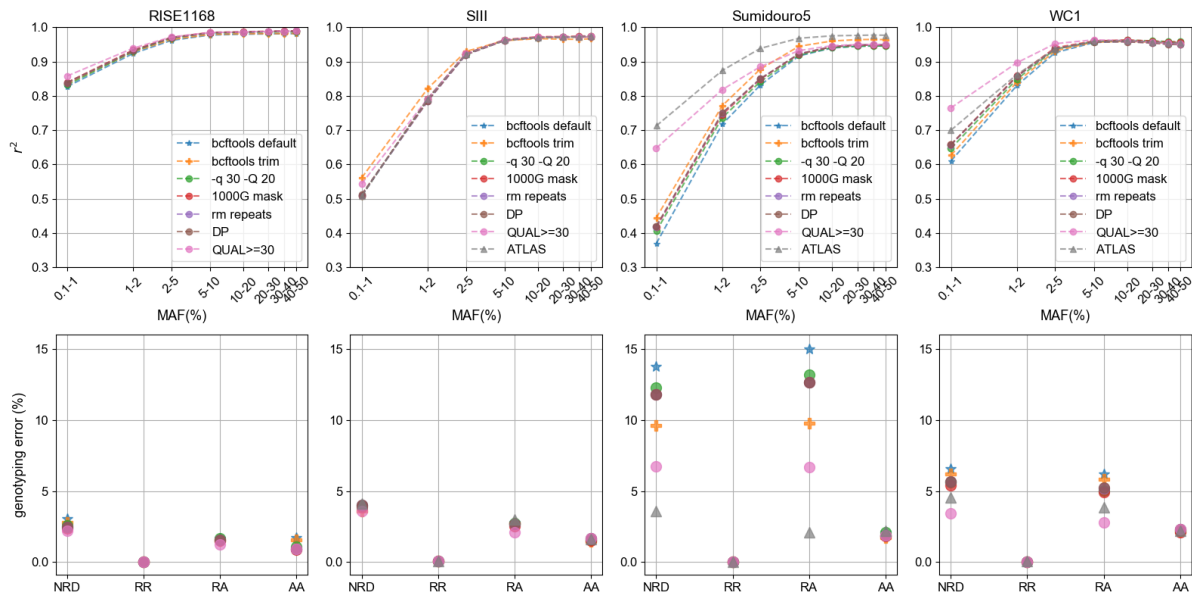

**Supplementary Fig. 2. Effect of applying quality filters to validation call set on imputed genotypes.** Imputation accuracy (first row) and genotype discordance (second row) for four different genomes, organized by column (RISE1168<sup>5,6</sup>, SIII<sup>4</sup>, Sumidouro5<sup>3</sup> and WC1<sup>7</sup>). The imputed genomes were downsampled to 1x coverage. The filters were applied in the following order: i) genotype calling with bcftools using reads with mapping quality of at least 30 and base quality 20 (“-q 30 -Q 20”), as well as the recommended option -C 50; ii) only sites present in the 1000 Genomes strict mask are retained; iii) exclusion of sites that are located in regions known to contain repetitions; iv) filtering out of sites that have depth below the maximum of one third of the mean depth of coverage and eight and sites that have depth above twice the mean depth; v) retaining

sites for which the field QUAL is equal or greater than 30. For each validation and filter, the same imputed data were used in this analysis.

## Supplementary Note 3: Individual samples

**Supplementary Table 1. Information on the ancient genomes used in the benchmark of imputation of low-coverage genomes.** Id, modern country where remains were found, age of remains in years before present (yBP), depth of coverage as reported in the original publications and at the 1000 Genomes bi-allelic sites, frequency of C-to-T mismatches at the 5' end (if entry contains "\*", the value or label is the one reported in the publication; if entry contains "-", it means we could not properly estimate the damage frequency and it was not reported in the publication in a clear way; otherwise, the values were obtained with bamdamage<sup>9</sup>), population of the 1000 Genomes panel whose minor allele frequency (MAF) was used in imputation accuracy analyses for each of the individuals, when applicable (AFR: Africa, AME: America, EAS: East Asia, EUR: Europe, SAS: South East Asia, All: overall allele frequency in 1000 Genomes), and respective publication. For RISE1160, a low-coverage genome, we do not indicate a MAF label, as we did not estimate imputation accuracy as a function of MAF for this genome. In the case of the ancient trio age (RISE1159, RISE1160 and RISE1168), we report a time span obtained for the mass grave as a whole. This range is the result of a model that took into consideration the number of contemporaneous individuals in the grave, radiocarbon dating of the different remains, as well as the ontogenetic constraints on how much the ages (e.g., parent/offspring relations) can vary<sup>5</sup>.

| ID           | Country      | Age range (yBP) | Reported coverage | Coverage in 1000G | C->T   | MAF label | Study                                                                                                       |
|--------------|--------------|-----------------|-------------------|-------------------|--------|-----------|-------------------------------------------------------------------------------------------------------------|
| atp016       | Spain        | 4867-5212       | 13.2              | 15.8              | 0.185  | EUR       | Valdiosera et al., <i>PNAS</i> (2018) <sup>10</sup>                                                         |
| Stuttgart    | Germany      | 7020-7260       | 16.2              | 19.1              | 0.038* | EUR       | Lazaridis et al., <i>Nature</i> (2014) <sup>11</sup>                                                        |
| Loschbour    | Luxembourg   | 7940-8160       | 18.2              | 21.2              | 0.027* | EUR       | Lazaridis et al., <i>Nature</i> (2014) <sup>11</sup>                                                        |
| Ballynahatty | Ireland      | 4970-5293       | 10.0              | 10.8              | 0.151  | EUR       | Cassidy et al., <i>PNAS</i> (2016) <sup>12</sup>                                                            |
| sf12         | Sweden       | 8757-9033       | 58.9              | 74.4              | UDG*   | EUR       | Günther et al., <i>PLoS Biology</i> (2018) <sup>13</sup>                                                    |
| NE1          | Hungary      | 7021-7256       | 18.4              | 21.8              | 0.096  | EUR       | Gamba et al., <i>Nat. Com.</i> (2014) <sup>14</sup>                                                         |
| RISE1159     | Poland       | 4726-4830       | 27.5              | 33.5              | 0.110  | EUR       | Schroeder et al., <i>PNAS</i> (2019) <sup>5</sup> ;<br>Allentoft et al., <i>bioRxiv</i> (2022) <sup>6</sup> |
| RISE1160     | Poland       | 4587-4841       | 5.4               | 7.1               | 0.166  | -         | Schroeder et al., <i>PNAS</i> (2019) <sup>5</sup> ;<br>Allentoft et al., <i>bioRxiv</i> (2022) <sup>6</sup> |
| RISE1168     | Poland       | 4726-4830       | 18.9              | 23.4              | 0.112  | EUR       | Schroeder et al., <i>PNAS</i> (2019) <sup>5</sup> ;<br>Allentoft et al., <i>bioRxiv</i> (2022) <sup>6</sup> |
| SIII         | Russia       | 33031-35154     | 11.2              | 11.9              | 0.016  | EUR       | Sikora et al., <i>Science</i> (2017) <sup>4</sup>                                                           |
| Rathlin1     | Ireland      | 3835-3976       | 10.8              | 11.8              | 0.143  | EUR       | Cassidy et al., <i>PNAS</i> (2016) <sup>12</sup>                                                            |
| SSG-A-2      | Iceland      | 950-1100        | 10.2              | 11.5              | -      | EUR       | Ebenesersdottir et al., <i>Science</i> (2018) <sup>15</sup>                                                 |
| HSJ-A-1      | Iceland      | 950-1080        | 29.4              | 33.3              | -      | EUR       | Ebenesersdottir et al., <i>Science</i> (2018) <sup>15</sup>                                                 |
| STT-A-2      | Iceland      | 950-1050        | 14.1              | 16.1              | -      | EUR       | Ebenesersdottir et al., <i>Science</i> (2018) <sup>15</sup>                                                 |
| VK1          | Greenland    | 750-950         | 12.1              | 14.4              | 0.096  | EUR       | Margaryan et al., <i>Nature</i> (2020) <sup>16</sup>                                                        |
| BR2          | Hungary      | 3060-3220       | 18.3              | 21.7              | 0.073  | EUR       | Gamba et al., <i>Nat. Com.</i> (2014) <sup>14</sup>                                                         |
| SZ15         | Hungary      | 1346-1538       | 10.6              | 11.6              | UDG*   | EUR       | Amorim et al., <i>Nat. Com.</i> (2018) <sup>17</sup>                                                        |
| SZ3          | Hungary      | 1346-1538       | 10.6              | 11.3              | UDG*   | EUR       | Amorim et al., <i>Nat. Com.</i> (2018) <sup>17</sup>                                                        |
| SZ4          | Hungary      | 1347-1538       | 10.4              | 11.1              | UDG*   | EUR       | Amorim et al., <i>Nat. Com.</i> (2018) <sup>17</sup>                                                        |
| SZ45         | Hungary      | 1347-1538       | 10.4              | 11.3              | UDG*   | EUR       | Amorim et al., <i>Nat. Com.</i> (2018) <sup>17</sup>                                                        |
| SZ43         | Hungary      | 1347-1538       | 11.6              | 12.5              | UDG*   | EUR       | Amorim et al., <i>Nat. Com.</i> (2018) <sup>17</sup>                                                        |
| SZ1          | Hungary      | 3220-5320       | 10.9              | 11.5              | UDG*   | EUR       | Amorim et al., <i>Nat. Com.</i> (2018) <sup>17</sup>                                                        |
| baa01        | South Africa | 1831-1986       | 13.5              | 17.9              | 0.045  | AFR       | Schlebusch et al., <i>Science</i> (2017) <sup>18</sup>                                                      |
| ela01        | South Africa | 453-533         | 13.5              | 17.3              | 0.030  | AFR       | Schlebusch et al., <i>Science</i> (2017) <sup>18</sup>                                                      |
| new01        | South Africa | 327-508         | 10.9              | 14.4              | 0.037  | AFR       | Schlebusch et al., <i>Science</i> (2017) <sup>18</sup>                                                      |
| I10871       | Cameroon     | 7800-7970       | 15.2              | 24.0              | 0.065  | AFR       | Lipson et al., <i>Nature</i> (2020) <sup>19</sup>                                                           |
| Mota         | Ethiopia     | 4419-4525       | 10.2              | 11.5              | 0.210* | AFR       | Gallego Llorente et al., <i>Science</i> (2015) <sup>20</sup>                                                |
| KK1          | Georgia      | 9550-9890       | 11.8              | 12.7              | 0.250* | EUR       | Jones et al., <i>Nat. Com.</i> , (2015) <sup>21</sup>                                                       |
| WC1          | Iran         | 9032-9405       | 10.4              | 11.9              | 0.220  | EUR       | Broushaki et al., <i>Science</i> (2016) <sup>7</sup>                                                        |
| BOT2016      | Kazakhstan   | 5318-5582       | 13.9              | 15.0              | 0.208  | EUR       | Damgaard et al., <i>Science</i> (2018) <sup>22</sup>                                                        |
| Yamnaya      | Kazakhstan   | 4837-4968       | 26.4              | 28.1              | 0.188  | EUR       | Damgaard et al., <i>Science</i> (2018) <sup>22</sup>                                                        |
| Andaman      | India        | 30-150          | 16.6              | 19.0              | 0.049  | SAS       | Moreno-Mayar et al., <i>Science</i> (2018) <sup>3</sup>                                                     |
| UstIshim     | Russia       | 42560-47480     | 35.2              | 41.6              | 0.022  | All       | Fu et al., <i>Nature</i> (2014) <sup>23</sup>                                                               |
| Yana         | Russia       | 30950-32950     | 26.5              | 28.9              | 0.139  | All       | Sikora et al., <i>Nature</i> (2019) <sup>24</sup>                                                           |
| Kolyma_River | Russia       | 9665-9906       | 15.0              | 16.1              | 0.120  | All       | Sikora et al., <i>Nature</i> (2019) <sup>24</sup>                                                           |
| USR1         | USA          | 11270-11600     | 17.1              | 18.6              | 0.011  | AME       | Moreno-Mayar et al., <i>Nature</i> (2018) <sup>25</sup>                                                     |
| AHUR_2064    | USA          | 10770-11170     | 18.9              | 20.4              | 0.012  | AME       | Moreno-Mayar et al., <i>Science</i> (2018) <sup>3</sup>                                                     |
| Lovelock2    | USA          | 1818-1942       | 15.4              | 16.6              | 0.008  | AME       | Moreno-Mayar et al., <i>Science</i> (2018) <sup>3</sup>                                                     |
| Lovelock3    | USA          | 567-687         | 19.1              | 20.6              | 0.008  | AME       | Moreno-Mayar et al., <i>Science</i> (2018) <sup>3</sup>                                                     |
| Saqqaq       | Greenland    | 3600-4170       | 13.4              | 17.1              | 0.008  | AME       | Rasmussen et al., <i>Nature</i> (2010) <sup>26</sup>                                                        |
| Clovis       | USA          | 12572-12726     | 15.1              | 17.9              | 0.162  | AME       | Moreno-Mayar et al., <i>Science</i> (2018) <sup>3</sup>                                                     |
| Sumidouro5   | Brazil       | 10258-10552     | 15.8              | 16.8              | 0.420  | AME       | Moreno-Mayar et al., <i>Science</i> (2018) <sup>3</sup>                                                     |
| A460         | Chile        | 4430-4850       | 11.1              | 11.9              | 0.150  | AME       | Moreno-Mayar et al., <i>Science</i> (2018) <sup>3</sup>                                                     |

**Supplementary Table 2. Sample categories defined in this study**

| ID           | Sample category    |
|--------------|--------------------|
| atp016       | Prehistoric Europe |
| Stuttgart    | Prehistoric Europe |
| Loschbour    | Prehistoric Europe |
| Ballynahatty | Prehistoric Europe |
| sf12         | Prehistoric Europe |
| NE1          | Prehistoric Europe |
| RISE1159     | Prehistoric Europe |
| RISE1160     | Prehistoric Europe |
| RISE1168     | Prehistoric Europe |
| SIII         | Prehistoric Europe |
| Rathlin1     | Historic Europe    |
| SSG-A-2      | Historic Europe    |
| HSJ-A-1      | Historic Europe    |
| STT-A-2      | Historic Europe    |
| VK1          | Historic Europe    |
| BR2          | Historic Europe    |
| SZ15         | Historic Europe    |
| SZ3          | Historic Europe    |
| SZ4          | Historic Europe    |
| SZ45         | Historic Europe    |
| SZ43         | Historic Europe    |
| SZ1          | Historic Europe    |
| baa01        | Africa             |
| ela01        | Africa             |
| new01        | Africa             |
| I10871       | Africa             |
| Mota         | Africa             |
| KK1          | Western Asia       |
| WC1          | Western Asia       |
| BOT2016      | Western Asia       |
| Yamnaya      | Western Asia       |
| Andaman      | South Asia         |
| UstIshim     | Siberia            |
| Yana         | Siberia            |
| Kolyma_River | Siberia            |
| USR1         | Americas           |
| AHUR_2064    | Americas           |
| Lovelock2    | Americas           |
| Lovelock3    | Americas           |
| Saqqaq       | Americas           |
| Clovis       | Americas           |
| Sumidouro5   | Americas           |
| A460         | Americas           |



## Supplementary Note 4: Comparing imputation of ancient and present-day genomes

To determine how imputation of ancient and present-day genomes differ, we downsampled to 1x and imputed 23 present-day European high-coverage genomes present in the Simons Diversity Project (SGDP<sup>27</sup>) dataset (Supplementary Table 3). We subsequently assessed imputation performance for these genomes and compared with the results obtained when imputing 21 ancient European genomes (nine and 12 in the “Prehistoric Europe” and “Historic Europe” categories, respectively), which had been previously downsampled to 1x.

We found that the imputation accuracy of the abovementioned present-day genomes was similar to what we had obtained in the case of the European ancient genomes (Supplementary Fig. 3). At SNPs with MAF between 0.1% and 1%,  $r^2$  (imputation accuracy) was 0.78, 0.85 and 0.81 for the prehistoric, ancient historic and present-day European genomes, respectively (Supplementary Fig. 3a). For sites with MAF>1%, the  $r^2$  values of the three datasets converged, with a minimum value of around 0.90. The same trend can be seen when comparing non-reference discordance (NRD) values per sample (Supplementary Fig. 3b). The mean NRD was 2.80%, 2.21% and 2.78% and was in the range 2.05%-3.57%, 1.29%-3.10% and 2.01%-3.99% for the prehistoric, ancient historic and present-day European genomes, respectively.

**Supplementary Table 3. Subset of 23 European SGDP genomes used to compare imputation of ancient and present-day genomes.** In this table, we report the SGDP sample IDs, the countries of origin and mean depths of coverage, as reported in Mallick et al<sup>27</sup>.

| ID (SGDP)     | Country                 | Coverage |
|---------------|-------------------------|----------|
| S_Albanian-1  | Albania                 | 36.2     |
| S_Bulgarian-1 | Bulgaria                | 42.7     |
| S_Bulgarian-2 | Bulgaria                | 37.5     |
| S_Czech-2     | Czechoslovakia(pre1989) | 49.7     |
| S_Estonian-2  | Estonia                 | 35.2     |
| S_Estonian-1  | Estonia                 | 38.4     |
| S_French-1    | France                  | 44.3     |
| S_French-2    | France                  | 40.2     |
| S_Basque-1    | France                  | 41.9     |
| S_Basque-2    | France                  | 38.5     |
| B_French-3    | France                  | 43.4     |
| S_Greek-1     | Greece                  | 37.7     |
| S_Greek-2     | Greece                  | 45.5     |
| B_Crete-2     | Greece                  | 42.7     |
| S_Hungarian-2 | Hungary                 | 40.7     |
| S_Hungarian-1 | Hungary                 | 40.1     |
| S_Icelandic-1 | Iceland                 | 38.3     |
| S_Icelandic-2 | Iceland                 | 49.3     |
| B_Sardinian-3 | Italy                   | 39.5     |
| S_Bergamo-1   | Italy(Bergamo)          | 68.6     |
| S_Bergamo-2   | Italy(Bergamo)          | 80.0     |
| S_Sardinian-1 | Italy(Sardinia)         | 36.4     |
| S_Sardinian-2 | Italy(Sardinia)         | 34.8     |

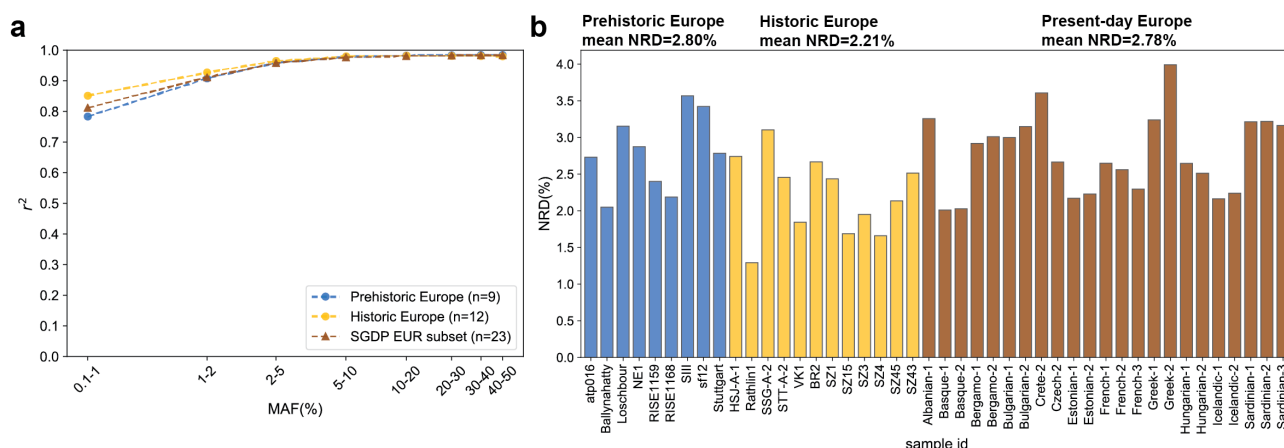

**Supplementary Fig. 3. Imputation performance of ancient and present-day 1x European genomes.** **a** Imputation accuracy,  $r^2$ , as a function of minor allele frequency, MAF, for the aggregate of prehistoric (blue), ancient historic Europeans (yellow) and a subset of 23 present-day individuals in SGDP (brown). **b** Non-reference discordance (NRD) per individual sample.

## Supplementary Note 5: Imputation accuracy for transitions and transversions and method comparison

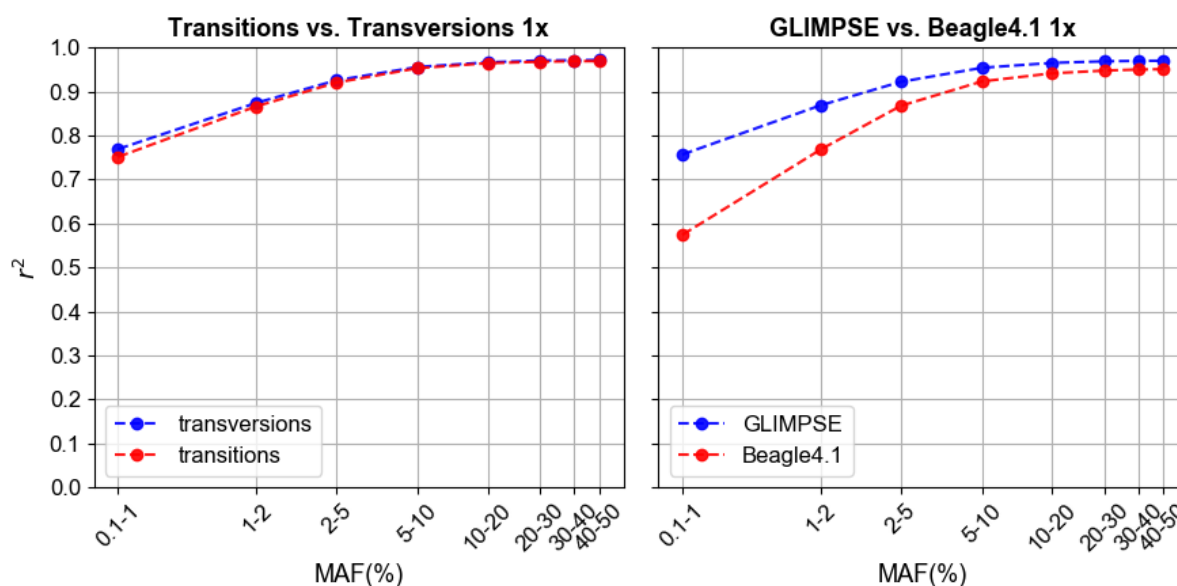

**Supplementary Fig. 4. Comparing imputation performance between mutation types and imputation methods.** Imputation accuracy,  $r^2$ , for the aggregate of the 42 ancient genomes, previously downsampled to 1x, as a function of 1000 Genomes Project minor allele frequency (MAF), 0.1-50%, regarding (left to right) i) transitions (green) compared to transversions (purple), and ii) comparison between imputation methods, Beagle4.1<sup>28</sup> (green) vs. GLIMPSE1.1.1<sup>29</sup> (purple).

## Supplementary Note 6: Genotype discordance between imputed 1x and high-coverage genomes

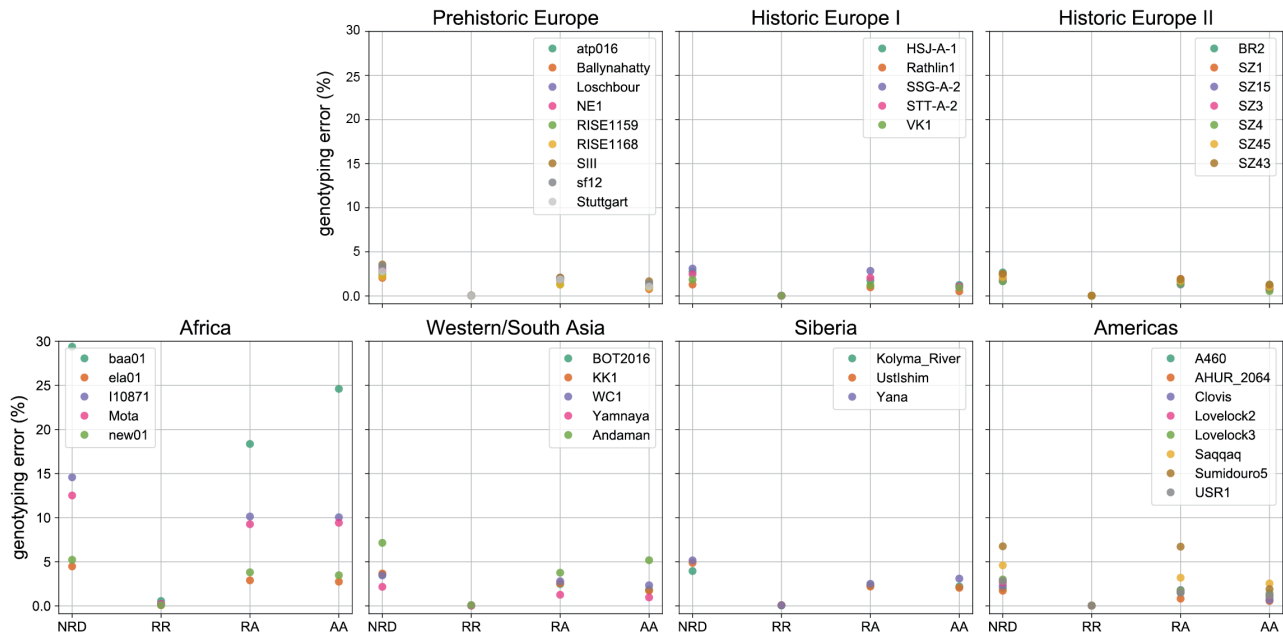

**Supplementary Fig. 5. Imputation genotyping errors for 1x genomes.** Genotype discordance between individual imputed (1x) and high-coverage genomes for homozygous reference allele (RR), heterozygous (RA) and homozygous alternative allele (AA) sites, as well as the resulting non-reference discordance (NRD).

## Supplementary Note 7: Imputing ancient Native American genomes using subsets of the 1000 Genomes reference panel

The ancient Native American genomes were accurately imputed, even though these ancestries are only represented through admixed individuals in the American reference populations. To understand whether it was these populations' presence in the 1000 Genomes reference panel that allowed for such high imputation accuracy, we further imputed the eight Native American ancient genomes (1x) using subsets of the 1000 Genomes panel. We generated five different subsets by removing one continental group (of size around 500) for each so that the subset sizes would be approximately the same. Comparing to imputation with the full reference panel, imputation accuracy remained unaltered when removing a continental group, except when removing the 1000G American

populations (Supplementary Fig. 6). This hints that GLIMPSE is only copying from American haplotypes in the reference panel. Without this reference population, imputation accuracy drastically dropped at rare variants (MAF<2%), reaching 0.46 at MAF between 0.1% and 1% (vs. 0.78 in the remaining five imputation experiments). The difference in imputation accuracy was much smaller at common variants, where the values converged across the different experiments as MAF increased. This analysis shows that the American populations in 1000G greatly contributed to imputation of rare variants in the Native Americans ancient individuals. Nonetheless, common variants (MAF>5%) were accurately imputed even when the American reference populations were removed. This suggests that poorly represented non-African genomes can still be accurately imputed when restricting to common variants, likely due to a more recent common history, that is, smaller coalescent distance, between non-Africans.

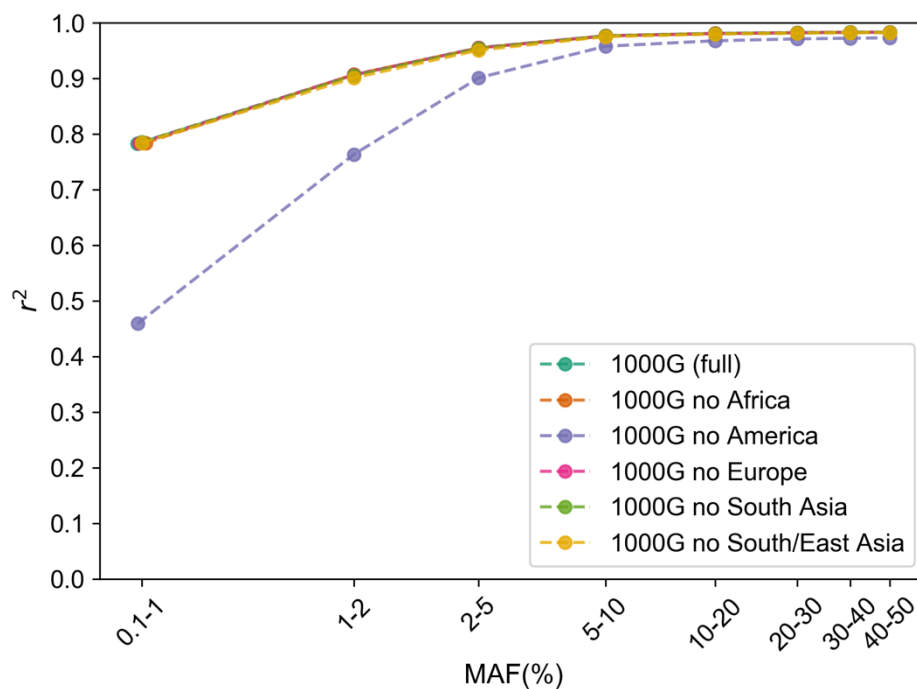

**Supplementary Fig. 6. Contribution of 1000 Genomes continental groups to imputation of ancient Native American genomes.** Imputation accuracy,  $r^2$ , as a function of minor allele frequency (MAF) of the aggregate of eight 1x ancient Native Americans genomes when using the full 1000 Genomes as a reference panel and when removing one continental group at a time.

## Supplementary Note 8: Effect of sample age on imputation accuracy

To verify whether sample age impacts imputation performance, we plotted imputation accuracy ( $r^2$ ) against sample age for all the 42 imputed 1x ancient data for which we have available high-coverage genomes. Given the observation that imputation accuracy is much lower at rare variants (between 0.4 and 0.6 when MAF is between 0.1% and 1%) for the oldest samples in our dataset (Figure 2a), i.e., SIII (~34,000 ybp), Yana (~32,000 ybp) and Ust'Ishim (~45,000 ybp), we split this analysis in the eight MAF bins for which we calculated imputation accuracy (Supplementary Fig. 7). For each MAF bin, we computed Spearman correlation ( $r_s$ ) between age and  $r^2$ . We indeed found significantly negative correlation values (at 5% threshold) for the lowest MAF bins, i.e., 0.1%-1% and 1%-2%:  $r_s=-0.465$  ( $p$ -value=0.002) and  $r_s=-0.324$  ( $p$ -value=0.036), respectively. For more common variants, no relationship between age and imputation accuracy emerged.

Here we showed that age negatively affects imputation accuracy at rare variants. However, at such variants, the imputation accuracies of the three oldest samples and the youngest sample (Andaman) are similar. The Andaman genome comes from an isolated population that is not well represented in the 1000 Genomes reference panel. This observation hints that a large distance in time translates into genetic differences to the reference panel in a similar way as a more recent, but more distant to the reference panel non-African genome.

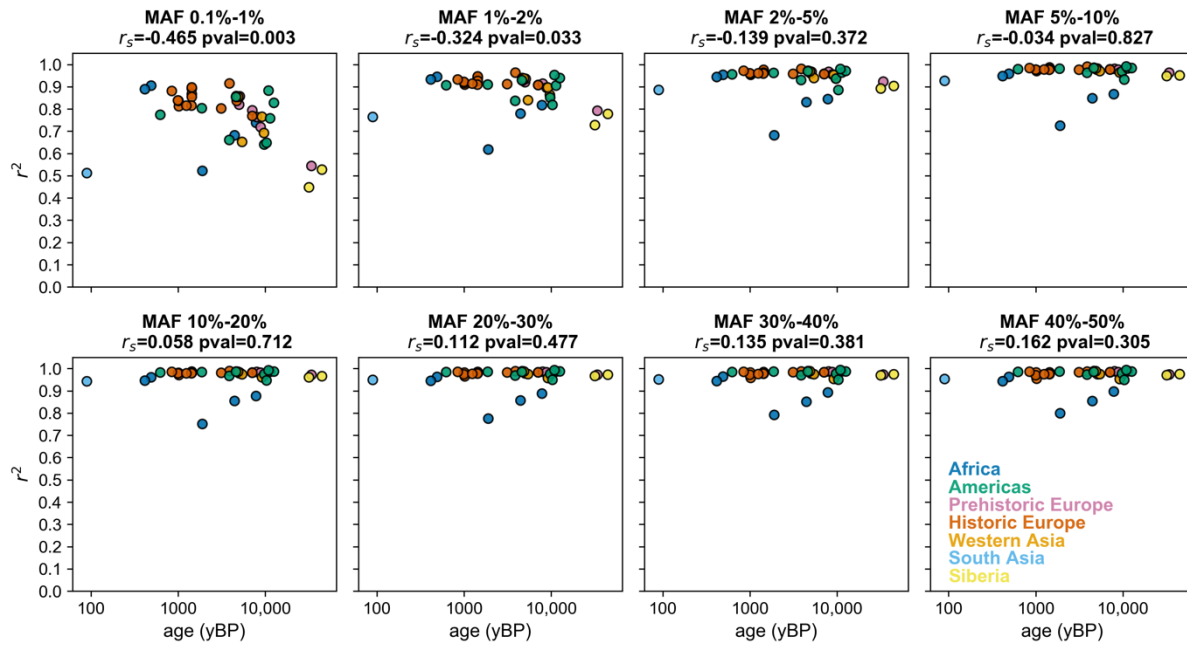

**Supplementary Fig. 7. Effect of sample age on imputation.** Relationship between sample age (x-axis) on imputation accuracy,  $r^2$  (y-axis), split in eight minor allele frequency (MAF) bins. For each MAF bin, we report the Spearman correlation ( $r_s$ ) between  $r^2$  and age, and the corresponding  $p$ -value, that resulted from testing whether the two variables were significantly correlated using a two-sided permutation test with 10,000 permutations ( $n=42$ ). No adjustments were made for multiple comparisons. Each dot corresponds to an imputed 1x genome.

## Supplementary Note 9: Imputation of ancient capture data

**Supplementary Table 4. Individual samples for which we had access to both whole-genome sequencing (WGS) and capture (on the 1240K array) data.** Here, we report the depth of coverage of the capture data at the intersection of the 1240K and 1000 Genomes panel variant sites and at variants contained in the 1000 Genomes panel alone. We also report the depth of coverage of the corresponding WGS data.

| Sample Id | Capture coverage (1240K in 1000G) | Capture coverage (all sites 1000G) | Shotgun-sequenced genome coverage (all sites 1000G) |
|-----------|-----------------------------------|------------------------------------|-----------------------------------------------------|
| BOT2016   | 2.6                               | 0.2                                | 15.0                                                |
| BR2       | 1.5                               | 0.1                                | 21.7                                                |
| I10871    | 8.5                               | 0.9                                | 24.0                                                |
| NE1       | 1.7                               | 0.2                                | 21.8                                                |
| Stuttgart | 11.1                              | 0.7                                | 19.1                                                |

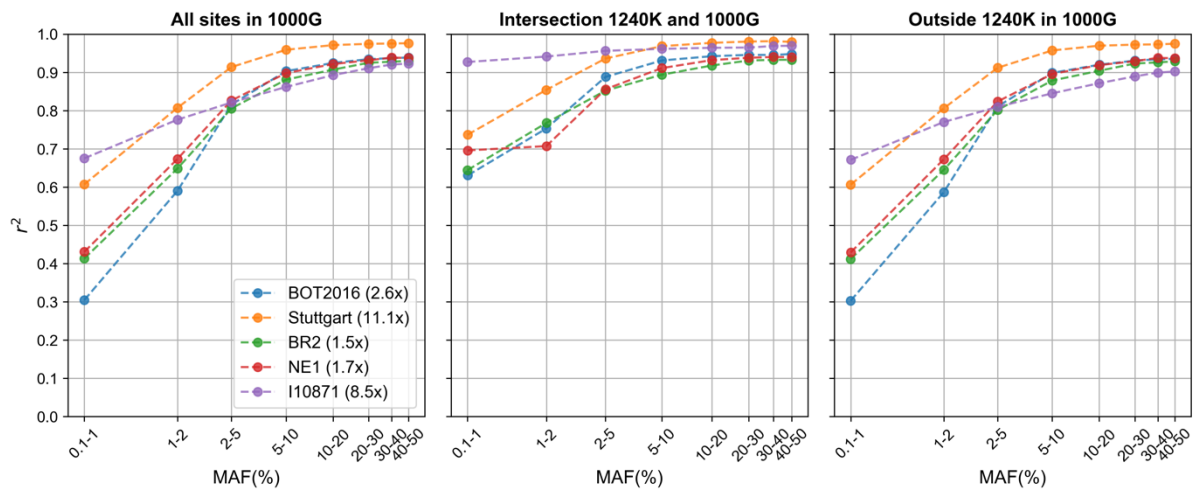

**Supplementary Fig. 8. Imputation of ancient capture genomes.** Imputation accuracy,  $r^2$ , as a function of minor allele frequency (MAF) when imputing the five capture genomes at full coverage at, from left to right, all variant sites in 1000 Genomes umich reference panel, the sites in the intersection of the latter with 1240K dataset, and the sites in 1000 Genomes umich outside of 1240K.



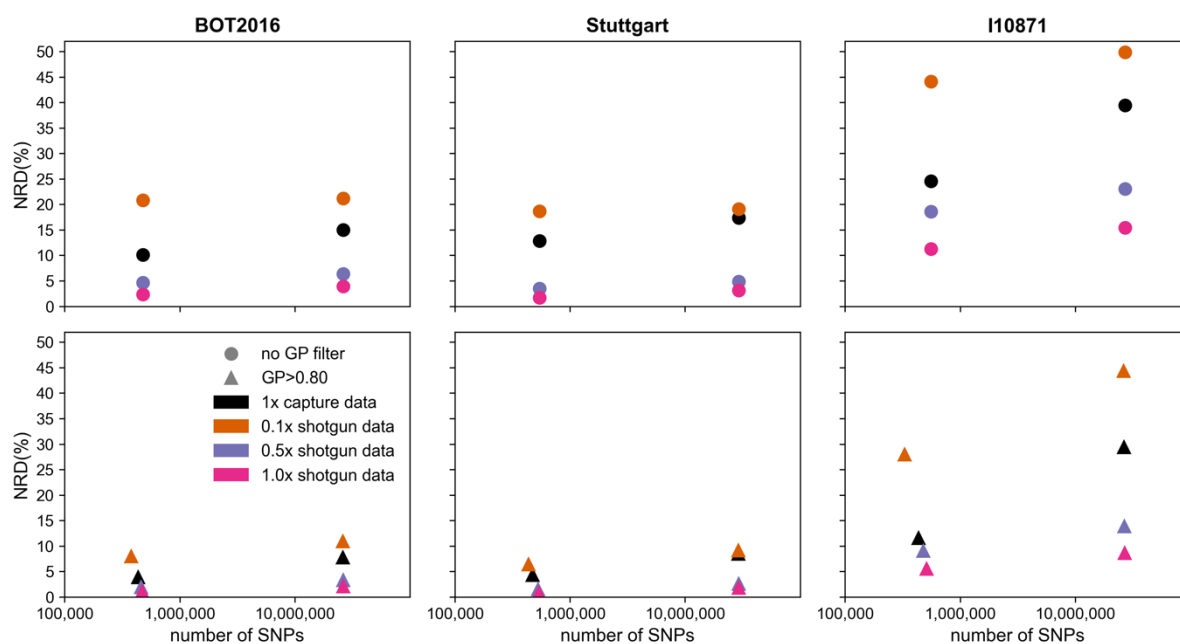

**Supplementary Fig. 9. Non-reference discordance (NRD) values against the number of SNPs obtained when imputing 1.0x capture genomes and whole genome data (0.1x, 0.5x and 1.0x) for the same individual samples (BOT2016, Stuttgart and I10871).** We report NRD at both the intersection of 1000G and 1240K sites and the 1000G sites located outside of this intersection. Top: no genotype probability (GP) filter; bottom: GP>0.80.

## Supplementary Note 10: PCA with focus on Europeans, several coverages

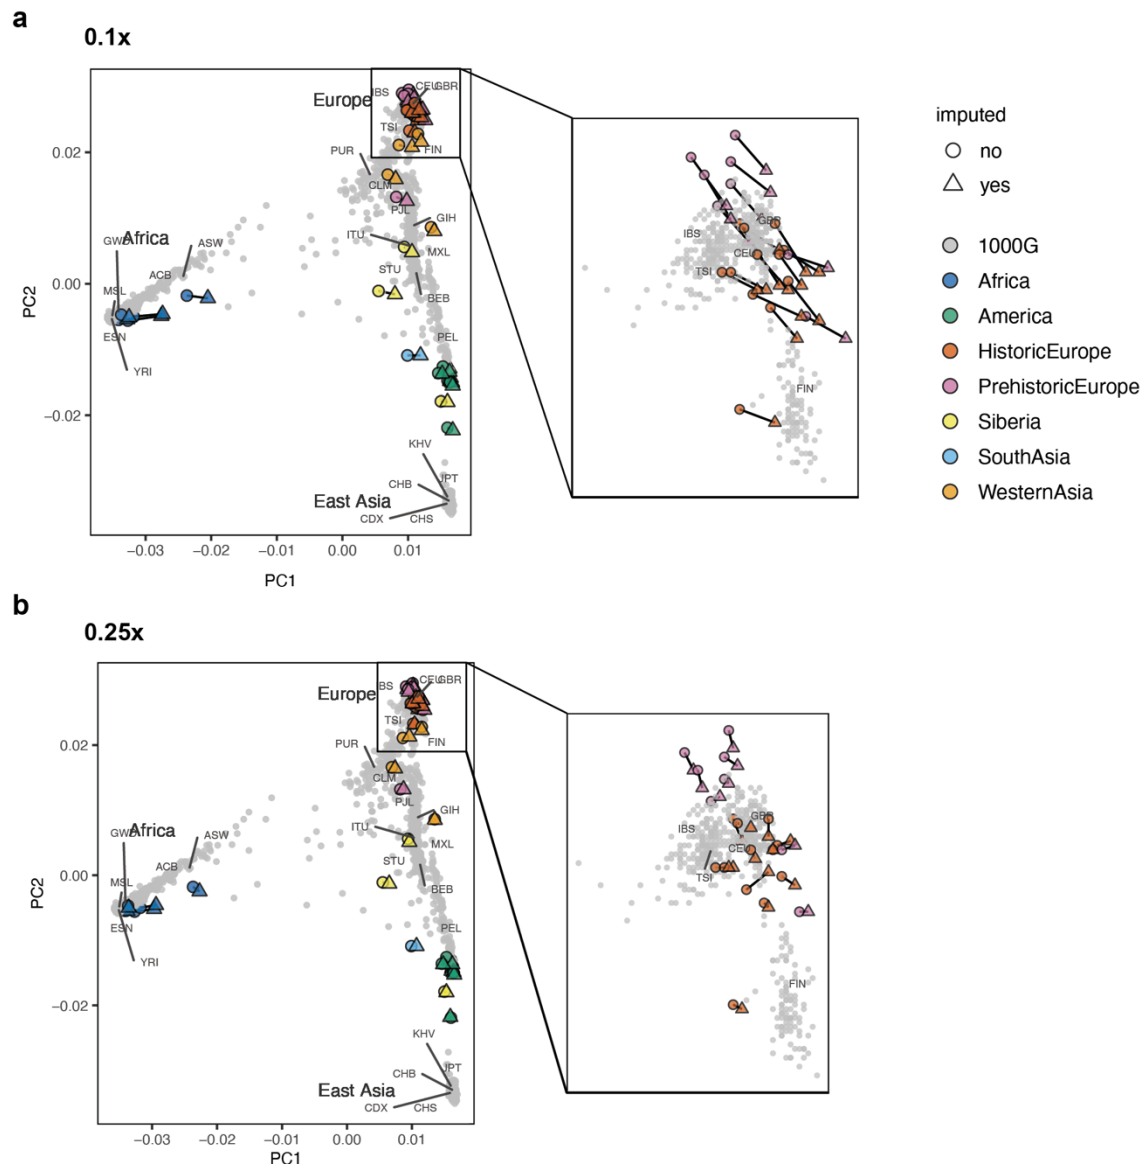

**Supplementary Fig. 10. Effect of imputing lower coverage ancient genomes on principal component analysis (PCA).** Principal component analysis (PCA) of imputed **a** 0.1x and **b** 0.25x and high-coverage ancient genetic data, and present-day data in 1000 Genomes reference panel (gray). Plots show individual coordinates along the two first principal components, zooming-in on the individuals of European ancestry. Imputed data points are represented by triangles and high-coverage ancient data by full circles. Corresponding imputed and high-coverage data are connected by a line.

### Supplementary Note 11: Genetic clustering analyses: from K=2 to K=5

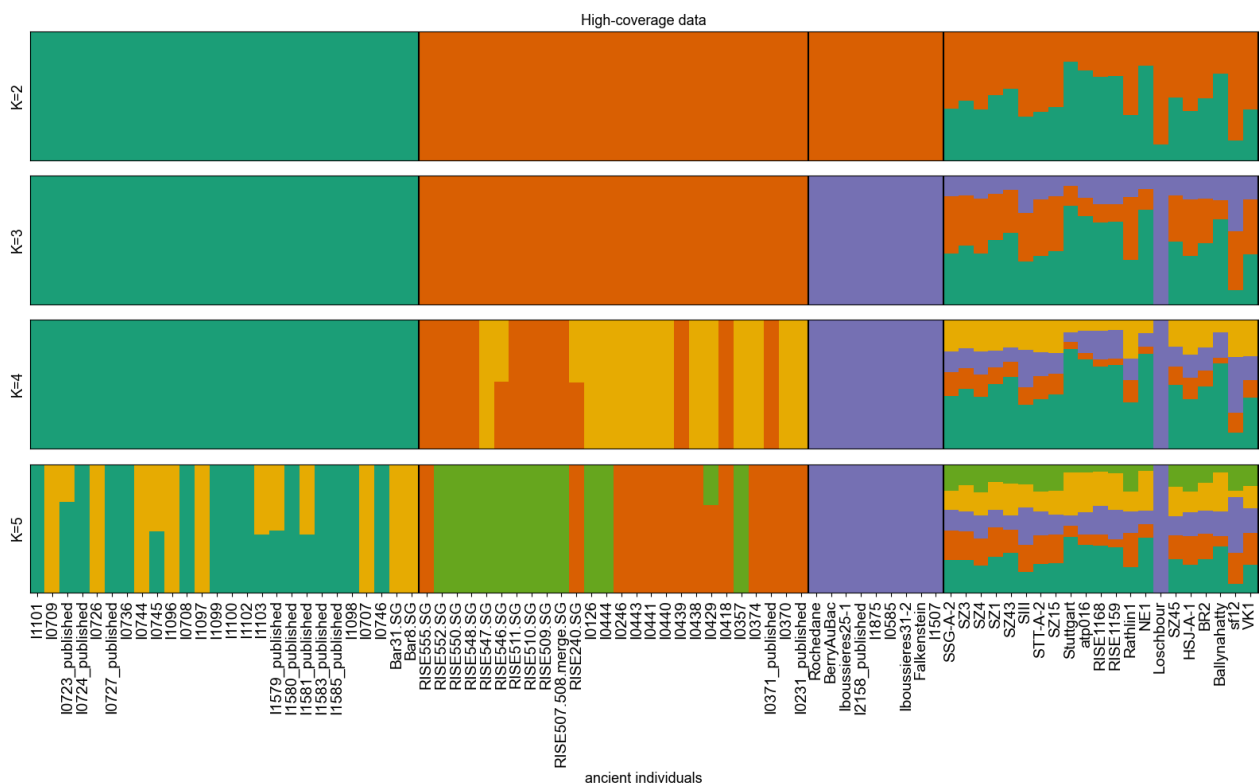



**Supplementary Fig. 13. Genetic clustering estimates for 21 0.25x imputed European ancient genomes.** Genetic clustering results obtained from running unsupervised ADMIXTURE with the genetic data of a subset of individuals in 1240K dataset and imputed 0.25x data (rightmost box), with varying number of clustering populations (K between 2 and 5).

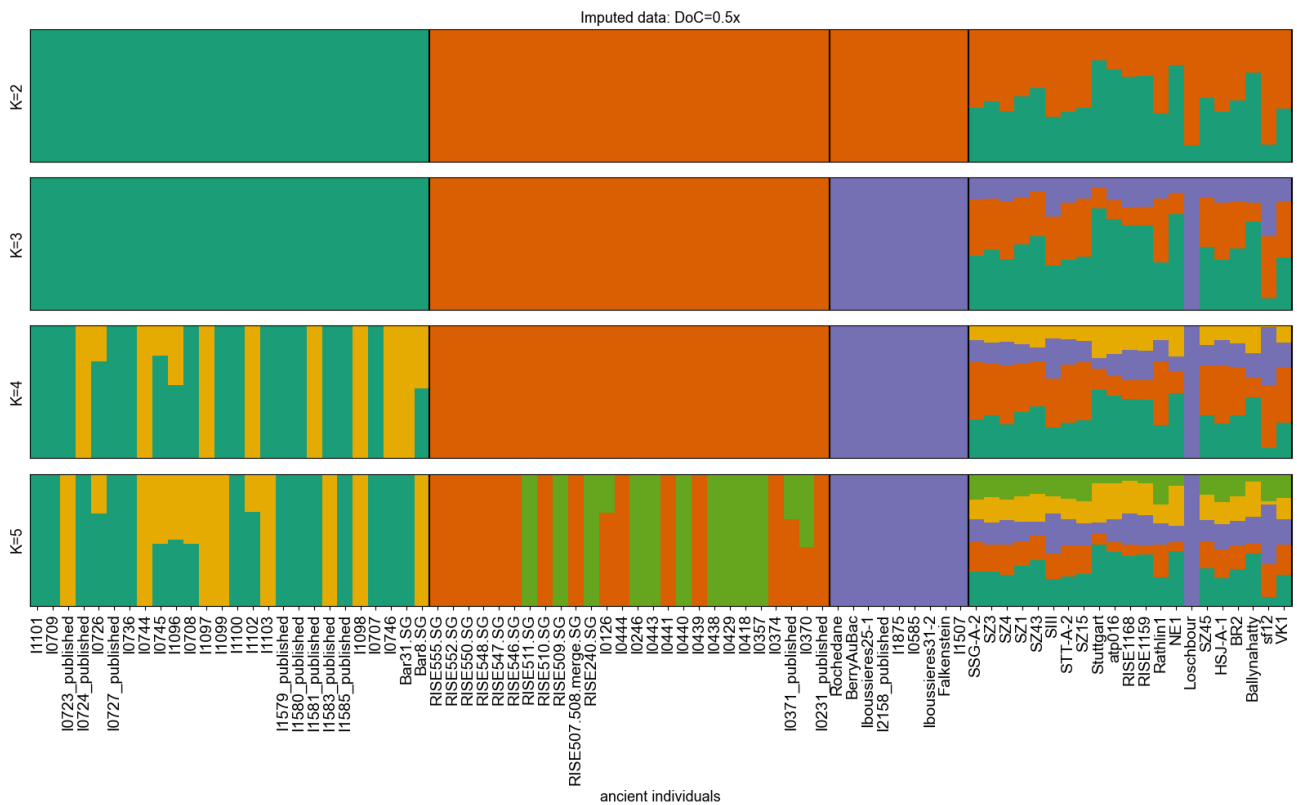

**Supplementary Fig. 14. Genetic clustering estimates for 21 0.5x imputed European ancient genomes.** Genetic clustering results obtained from running unsupervised ADMIXTURE with the genetic data of a subset of individuals in 1240K dataset and imputed 0.5x data (rightmost box), with varying number of clustering populations (K between 2 and 5).

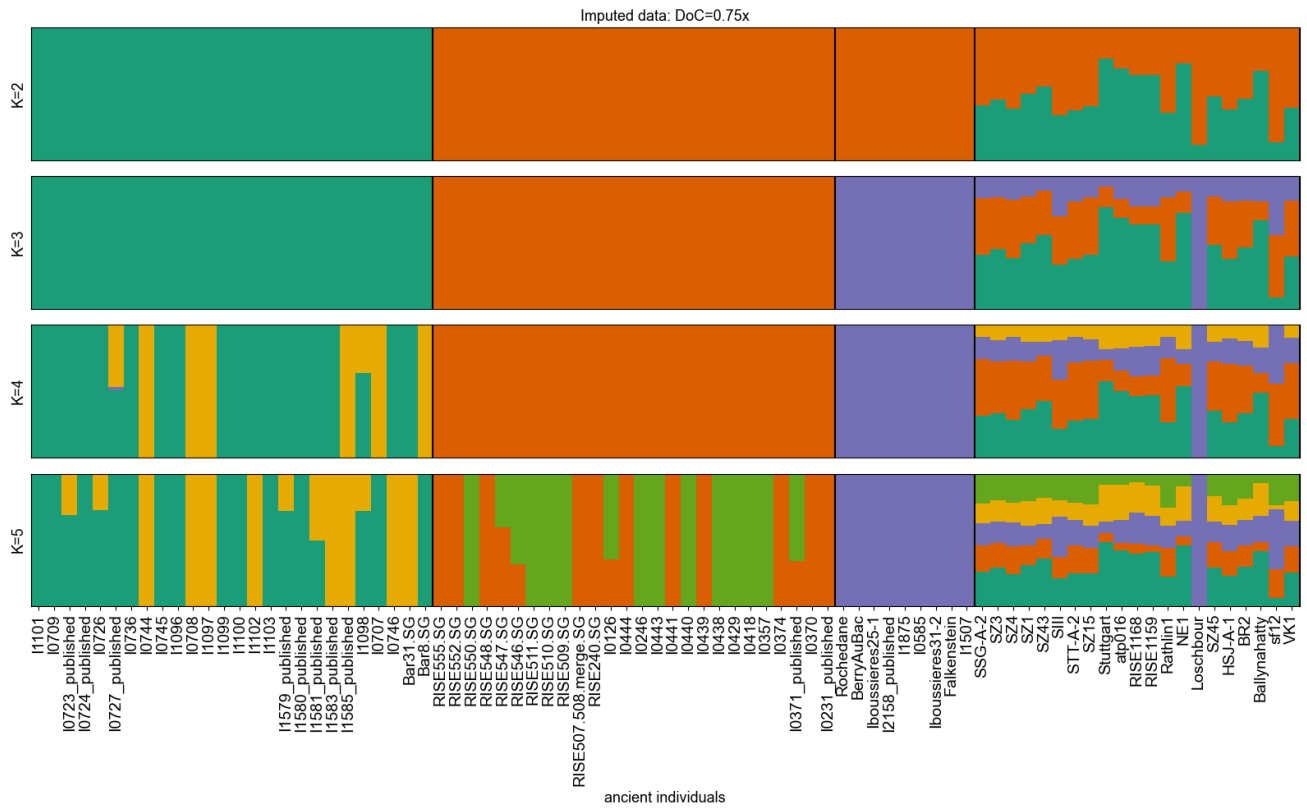

**Supplementary Fig. 15. Genetic clustering estimates for 21 0.75x imputed European ancient genomes.** Genetic clustering results obtained from running unsupervised ADMIXTURE with the genetic data of a subset of individuals in 1240K dataset and imputed 0.75x data (rightmost box), with varying number of clustering populations (K between 2 and 5).

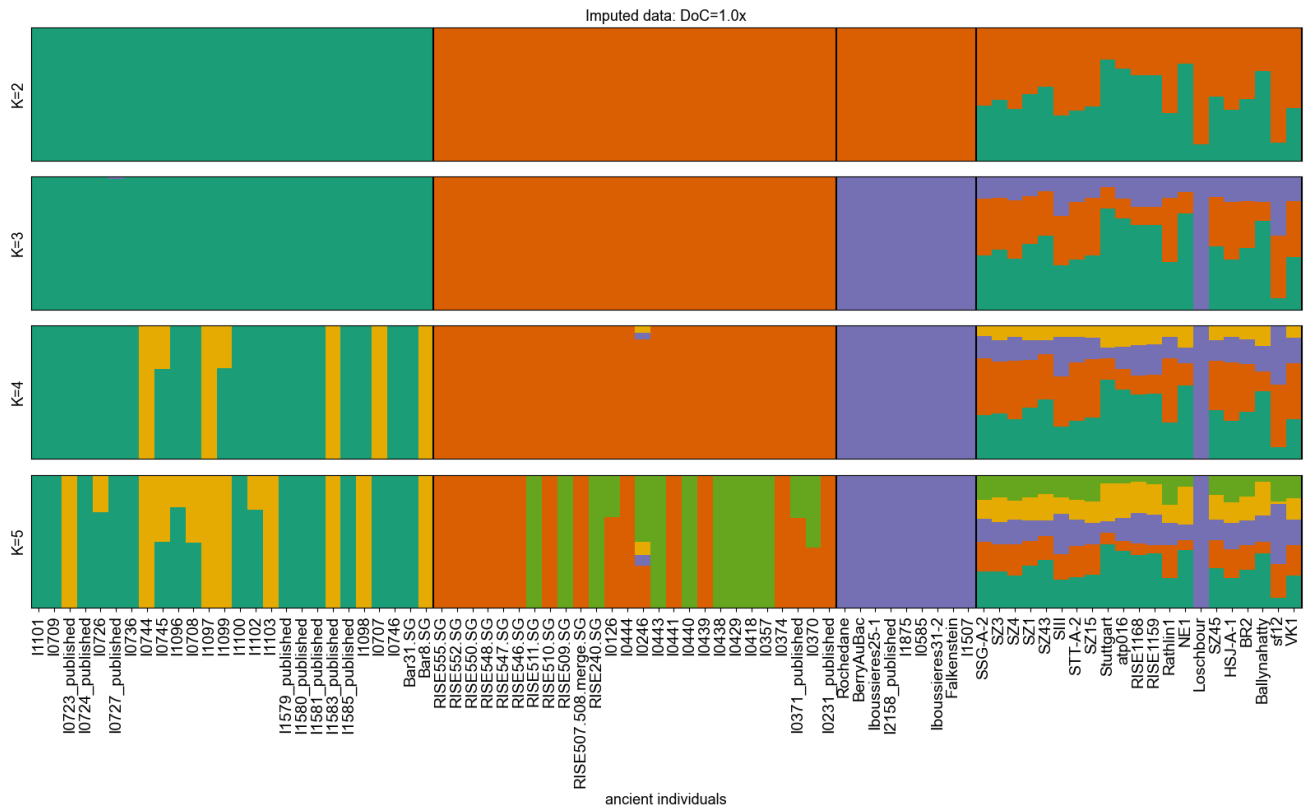

**Supplementary Fig. 16. Genetic clustering estimates for 21 1.0x imputed European ancient genomes.** Genetic clustering results obtained from running unsupervised ADMIXTURE with the genetic data of a subset of individuals in 1240K dataset and imputed 1.0x data (rightmost box), with varying number of clustering populations (K between 2 and 5).





**Supplementary Table 5. Subset of the 1240K dataset<sup>32</sup> used as reference in the genetic clustering analyses.** The individuals are grouped by population: Neolithic Anatolia (“Anatolia\_N”), western hunter-gatherer (“WHG”), Early to Middle Bronze Age Steppe (“Steppe\_EMBA”).

| Population  | Individual           | Publication                                            |
|-------------|----------------------|--------------------------------------------------------|
| Anatolia_N  | Bar31.SG             | Hofmanová et al., <i>PNAS</i> (2016) <sup>33</sup>     |
| Anatolia_N  | Bar8.SG              | Hofmanová et al., <i>PNAS</i> (2016) <sup>33</sup>     |
| Anatolia_N  | I0707                | Mathieson et al., <i>Nature</i> (2015) <sup>34</sup>   |
| Anatolia_N  | I0708                | Mathieson et al., <i>Nature</i> (2015) <sup>34</sup>   |
| Anatolia_N  | I0709                | Mathieson et al., <i>Nature</i> (2015) <sup>34</sup>   |
| Anatolia_N  | I0723_published      | Mathieson et al., <i>Nature</i> (2015) <sup>34</sup>   |
| Anatolia_N  | I0724_published      | Mathieson et al., <i>Nature</i> (2015) <sup>34</sup>   |
| Anatolia_N  | I0726                | Mathieson et al., <i>Nature</i> (2015) <sup>34</sup>   |
| Anatolia_N  | I0727_published      | Mathieson et al., <i>Nature</i> (2015) <sup>34</sup>   |
| Anatolia_N  | I0736                | Mathieson et al., <i>Nature</i> (2015) <sup>34</sup>   |
| Anatolia_N  | I0744                | Mathieson et al., <i>Nature</i> (2015) <sup>34</sup>   |
| Anatolia_N  | I0745                | Mathieson et al., <i>Nature</i> (2015) <sup>34</sup>   |
| Anatolia_N  | I0746                | Mathieson et al., <i>Nature</i> (2015) <sup>34</sup>   |
| Anatolia_N  | I1096                | Mathieson et al., <i>Nature</i> (2015) <sup>34</sup>   |
| Anatolia_N  | I1097                | Mathieson et al., <i>Nature</i> (2015) <sup>34</sup>   |
| Anatolia_N  | I1098                | Mathieson et al., <i>Nature</i> (2015) <sup>34</sup>   |
| Anatolia_N  | I1099                | Mathieson et al., <i>Nature</i> (2015) <sup>34</sup>   |
| Anatolia_N  | I1100                | Mathieson et al., <i>Nature</i> (2015) <sup>34</sup>   |
| Anatolia_N  | I1101                | Mathieson et al., <i>Nature</i> (2015) <sup>34</sup>   |
| Anatolia_N  | I1102                | Mathieson et al., <i>Nature</i> (2015) <sup>34</sup>   |
| Anatolia_N  | I1103                | Mathieson et al., <i>Nature</i> (2015) <sup>34</sup>   |
| Anatolia_N  | I1579_published      | Mathieson et al., <i>Nature</i> (2015) <sup>34</sup>   |
| Anatolia_N  | I1580_published      | Mathieson et al., <i>Nature</i> (2015) <sup>34</sup>   |
| Anatolia_N  | I1581_published      | Mathieson et al., <i>Nature</i> (2015) <sup>34</sup>   |
| Anatolia_N  | I1583_published      | Mathieson et al., <i>Nature</i> (2015) <sup>34</sup>   |
| Anatolia_N  | I1585_published      | Mathieson et al., <i>Nature</i> (2015) <sup>34</sup>   |
| WHG         | BerryAuBac           | Mathieson et al., <i>Nature</i> (2018) <sup>35</sup>   |
| WHG         | Falkenstein          | Mathieson et al., <i>Nature</i> (2018) <sup>35</sup>   |
| WHG         | I0585                | Mathieson et al., <i>Nature</i> (2015) <sup>34</sup>   |
| WHG         | I1507                | Mathieson et al., <i>Nature</i> (2015) <sup>34</sup>   |
| WHG         | I1875                | Mathieson et al., <i>Nature</i> (2018) <sup>35</sup>   |
| WHG         | I2158_published      | Mathieson et al., <i>Nature</i> (2018) <sup>35</sup>   |
| WHG         | Iboussieres25-1      | Mathieson et al., <i>Nature</i> (2018) <sup>35</sup>   |
| WHG         | Iboussieres31-2      | Mathieson et al., <i>Nature</i> (2018) <sup>35</sup>   |
| WHG         | Rochedane            | Mathieson et al., <i>Nature</i> (2018) <sup>35</sup>   |
| Steppe_EMBA | I0126                | Mathieson et al., <i>Nature</i> (2015) <sup>34</sup>   |
| Steppe_EMBA | I0231_published      | Narasimhan et al., <i>Science</i> (2019) <sup>36</sup> |
| Steppe_EMBA | I0246                | Narasimhan et al., <i>Science</i> (2019) <sup>36</sup> |
| Steppe_EMBA | I0357                | Mathieson et al., <i>Nature</i> (2015) <sup>34</sup>   |
| Steppe_EMBA | I0370                | Mathieson et al., <i>Nature</i> (2015) <sup>34</sup>   |
| Steppe_EMBA | I0371_published      | Mathieson et al., <i>Nature</i> (2015) <sup>34</sup>   |
| Steppe_EMBA | I0374                | Mathieson et al., <i>Nature</i> (2015) <sup>34</sup>   |
| Steppe_EMBA | I0418                | Mathieson et al., <i>Nature</i> (2015) <sup>34</sup>   |
| Steppe_EMBA | I0429                | Mathieson et al., <i>Nature</i> (2015) <sup>34</sup>   |
| Steppe_EMBA | I0438                | Mathieson et al., <i>Nature</i> (2015) <sup>34</sup>   |
| Steppe_EMBA | I0439                | Mathieson et al., <i>Nature</i> (2015) <sup>34</sup>   |
| Steppe_EMBA | I0440                | Mathieson et al., <i>Nature</i> (2015) <sup>34</sup>   |
| Steppe_EMBA | I0441                | Mathieson et al., <i>Nature</i> (2015) <sup>34</sup>   |
| Steppe_EMBA | I0443                | Mathieson et al., <i>Nature</i> (2015) <sup>34</sup>   |
| Steppe_EMBA | I0444                | Mathieson et al., <i>Nature</i> (2015) <sup>34</sup>   |
| Steppe_EMBA | RISE240.SG           | Allentoft et al., <i>Nature</i> (2015) <sup>37</sup>   |
| Steppe_EMBA | RISE507.508.merge.SG | Allentoft et al., <i>Nature</i> (2015) <sup>37</sup>   |
| Steppe_EMBA | RISE509.SG           | Allentoft et al., <i>Nature</i> (2015) <sup>37</sup>   |
| Steppe_EMBA | RISE510.SG           | Allentoft et al., <i>Nature</i> (2015) <sup>37</sup>   |
| Steppe_EMBA | RISE511.SG           | Allentoft et al., <i>Nature</i> (2015) <sup>37</sup>   |
| Steppe_EMBA | RISE546.SG           | Allentoft et al., <i>Nature</i> (2015) <sup>37</sup>   |
| Steppe_EMBA | RISE547.SG           | Allentoft et al., <i>Nature</i> (2015) <sup>37</sup>   |
| Steppe_EMBA | RISE548.SG           | Allentoft et al., <i>Nature</i> (2015) <sup>37</sup>   |
| Steppe_EMBA | RISE550.SG           | Allentoft et al., <i>Nature</i> (2015) <sup>37</sup>   |
| Steppe_EMBA | RISE552.SG           | Allentoft et al., <i>Nature</i> (2015) <sup>37</sup>   |
| Steppe_EMBA | RISE555.SG           | Allentoft et al., <i>Nature</i> (2015) <sup>37</sup>   |

## Supplementary Note 12: ROH estimates for Sumidouro5

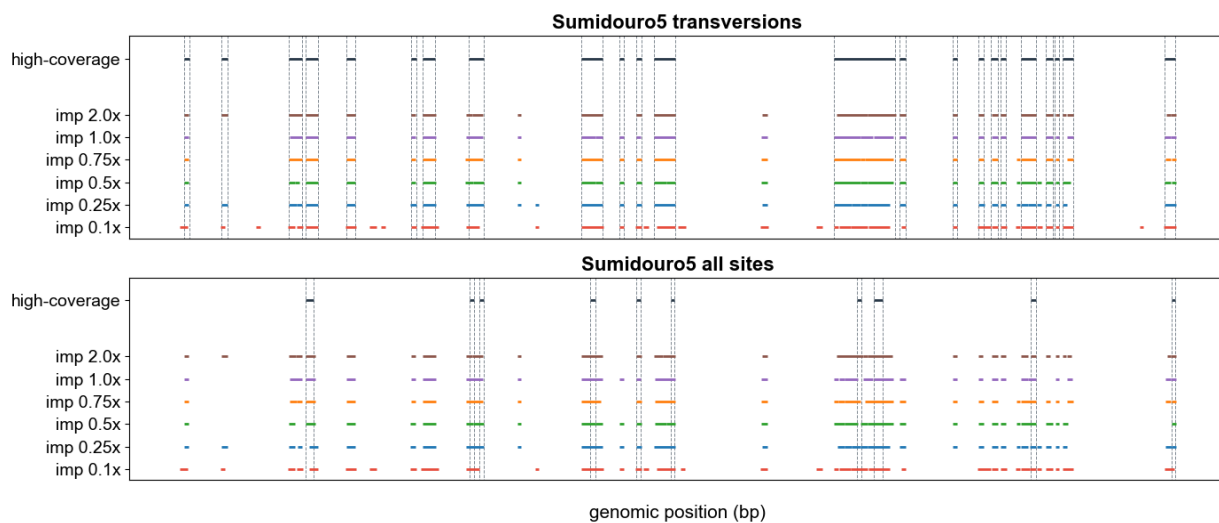

### Supplementary Fig. 18. ROH in Sumidouro5: imputation seems to correct C-to-T mismatches.

ROH segments identified in chromosome 10 for high-coverage and imputed data (DoC between 0.1x and 2.0x) for Sumidouro5. Top: ROH obtained using all sites. Bottom: ROH estimated using transversion sites only.

## Supplementary References

1. Li, H. *et al.* The Sequence Alignment/Map format and SAMtools. *Bioinforma. Appl. NOTE* **25**, 2078–2079 (2009).
2. Link, V. *et al.* ATLAS: Analysis Tools for Low-depth and Ancient Samples. *bioRxiv* 105346 (2017). doi:10.1101/105346
3. Moreno-Mayar, J. V. *et al.* Early human dispersals within the Americas. *Science* **362**, (2018).
4. Sikora, M. *et al.* Ancient genomes show social and reproductive behavior of early Upper Paleolithic foragers. *Science* **358**, 659–662 (2017).
5. ).
7. Broushaki, F. *et al.* Early Neolithic genomes from the eastern Fertile Crescent. *Science* **353**, 499–503 (2016).
8. Jun, G., Wing, M. K., Abecasis, G. R. & Kang, H. M. An efficient and scalable analysis framework for variant extraction and refinement from population scale DNA sequence data.

*Genome Res.* **25**, gr.176552.114 (2015).

9. Malaspinas, A. S. *et al.* bammds: a tool for assessing the ancestry of low-depth whole-genome data using multidimensional scaling (MDS). *Bioinformatics* **30**, 2962–2964 (2014).
10. Valdiosera, C. *et al.* Four millennia of Iberian biomolecular prehistory illustrate the impact of prehistoric migrations at the far end of Eurasia. *Proc. Natl. Acad. Sci. U. S. A.* **115**, 3428–3433 (2018).
11. Lazaridis, I. *et al.* Ancient human genomes suggest three ancestral populations for present-day Europeans. *Nature* **513**, 409–413 (2014).
12. Cassidy, L. M. *et al.* Neolithic and Bronze Age migration to Ireland and establishment of the insular atlantic genome. *Proc. Natl. Acad. Sci. U. S. A.* **113**, 368–373 (2016).
13. Günther, T. *et al.* Population genomics of Mesolithic Scandinavia : Investigating early postglacial migration routes and high-latitude adaptation. *PLoS Biol.* **16**, e2003703 (2018).
14. Gamba, C. *et al.* Genome flux and stasis in a five millennium transect of European prehistory. *Nat. Commun.* **5**, 1–9 (2014).
15. Ebenesersdóttir, S. S. *et al.* Ancient genomes from Iceland reveal the making of a human population. *Science* **360**, 1028–1032 (2018).
16. Margaryan, A. *et al.* Population genomics of the Viking world. *Nature* **585**, 390–396 (2020).
17. Amorim, C. E. G. *et al.* Understanding 6th-century barbarian social organization and migration through paleogenomics. *Nat. Commun.* **9**, 3547 (2018).
18. Schlebusch, C. M. *et al.* Southern African ancient genomes estimate modern human divergence to 350,000 to 260,000 years ago. *Science* **358**, 652–655 (2017).
19. Lipson, M. *et al.* Ancient West African foragers in the context of African population history. *Nature* **577**, 665–670 (2020).
20. Gallego Llorente, M. *et al.* Ancient Ethiopian genome reveals extensive Eurasian admixture throughout the African continent. *Science* **350**, 820–822 (2015).
21. Jones, E. R. *et al.* Upper Palaeolithic genomes reveal deep roots of modern Eurasians. *Nat. Commun.* **6**, 1–8 (2015).
22. de Barros Damgaard, P. *et al.* The first horse herders and the impact of early Bronze Age

steppe expansions into Asia. *Science* **360**, (2018).

23. Fu, Q. *et al.* Genome sequence of a 45,000-year-old modern human from western Siberia. *Nature* **514**, 445–449 (2014).
24. Sikora, M. *et al.* The population history of northeastern Siberia since the Pleistocene. *Nature* **570**, 182–188 (2019).
25. ).
